# Supplementary material
Source: PubMed Central journal article supplement (PMC4247804)
Supplement: NIHMS630748-supplement-109_2014_1209_MOESM1_ESM.pdf [file NIHMS630748-supplement-109_2014_1209_MOESM1_ESM.pdf]

Urinary semaphorin 3A correlates with diabetic proteinuria and mediates diabetic nephropathy and associated inflammation in mice. Riyaz Mohamed, Punithavathi Ranganathan, Calpurnia Jayakumar, Ferdau L. Nauta, Ron T. Gansevoort, Neal L. Weintraub, Michael Brands, Ganesan Ramesh. "J Mol Med 2014".

**Urinary semaphorin 3A correlates with diabetic proteinuria and mediates diabetic nephropathy and associated inflammation in mice**

Riyaz Mohamed<sup>1#</sup>

Punithavathi Ranganathan<sup>1#</sup>

Calpurnia Jayakumar<sup>1</sup>

Ferdau L. Nauta<sup>2</sup>

Ron T. Gansevoort<sup>2</sup>

Neal L. Weintraub<sup>1</sup>

Michael Brands<sup>3</sup>

Ganesan Ramesh<sup>1</sup>

<sup>1</sup>Vascular Biology Center

Georgia Regents University

Augusta, GA 30912

<sup>2</sup>Department of Nephrology, University Medical Center Groningen, University of Groningen, Groningen,

The Netherlands

<sup>3</sup>Department of Physiology

Georgia Regents University

Augusta, GA 30912

Urinary semaphorin 3A correlates with diabetic proteinuria and mediates diabetic nephropathy and associated inflammation in mice. Riyaz Mohamed, Punithavathi Ranganathan, Calpurnia Jayakumar, Ferdau L. Nauta, Ron T. Gansevoort, Neal L. Weintraub, Michael Brands, Ganesan Ramesh. "J Mol Med 2014".

#PR and RM equally contributed to this work.

**RUNNING TITLE:** Sema3A and diabetic nephropathy

**Correspondence Address:**

Ganesan Ramesh, Ph.D.

Department of Medicine/Vascular Biology Center, CB-3702

Georgia Regents University

1459 Laney-Walker Blvd

Augusta, GA 30912

TEL. NO. (706) 721-9728

FAX. NO. (707) 721-9799

E-mail: [gramesh@gru.edu](mailto:gramesh@gru.edu)

Urinary semaphorin 3A correlates with diabetic proteinuria and mediates diabetic nephropathy and associated inflammation in mice. Riyaz Mohamed, Punithavathi Ranganathan, Calpurnia Jayakumar, Ferdau L. Nauta, Ron T. Gansevoort, Neal L. Weintraub, Michael Brands, Ganesan Ramesh. "J Mol Med 2014".

Supplementary Table 1. Patient's characteristics and relationship of albumin creatinine categories based on ACR with variables of interest.

| Dependent Variables                 | Albumin creatinine  |                     |                     |                       | p-value |
|-------------------------------------|---------------------|---------------------|---------------------|-----------------------|---------|
|                                     | Control             | Normo               | Micro               | Macro                 |         |
|                                     | n=42                | n=40                | n=38                | n=9                   |         |
| Sex, n (% Female) #                 | 20 (48)             | 10 (25)             | 13 (34)             | 2 (22)                | 0.15    |
| Age, y *                            | 53.3±13.1 b         | 59.0±12.4 a,b       | 64.0±11.9 a         | 62.3±15.6 a,b         | 0.0028  |
| Weight, kg *                        | 84.3±18.3           | 91.3±14.8           | 93.9±18.0           | 92.4±10.3             | 0.065   |
| Height, m *                         | 1.76±0.08           | 1.75±0.07           | 1.72±0.09           | 1.73±0.09             | 0.092   |
| BMI, kg/m <sup>2</sup> *            | 27.2±6.3 b          | 30.0±5.3 a,b        | 31.9±6.4 a          | 31.5±5.2 a,b          | 0.0055  |
| SBP, mmHg *                         | 131.9±16.7 b        | 138.7±15.4 b        | 141.8±17.5 b        | 155.5±15.7 a          | 0.0007  |
| DBP, mmHg *                         | 74.1±9.1            | 77.7±10.2           | 76.7±9.5            | 80.2±12.4             | 0.24    |
| Hypertension, n (% Yes) #           | 14 (33)             | 33 (85)             | 35 (97)             | 8 (100)               | <0.0001 |
| Hypertension drug use, n (% Yes) #  | 6 (14)              | 27 (71)             | 33 (94)             | 8 (100)               | <0.0001 |
| Smoking, n (% Yes) #                | 9 (21)              | 4 (10)              | 11 (29)             | 3 (33)                | 0.16    |
| Cardiovascular history, n (% Yes) # | 0 (0)               | 9 (23)              | 16 (42)             | 6 (67)                | <0.0001 |
| Statin use, n (% Yes) #             | 8 (19)              | 17 (45)             | 21 (60)             | 6 (75)                | 0.0006  |
| HbA1c, % Mean±SD *                  | 5.37±0.33 b         | 7.67±1.06 a         | 7.69±1.33 a         | 7.74±0.76 a           | <0.0001 |
| Serum creatinine, µmol/L **         | 72 (54, 97) b       | 74 (54, 155) b      | 89 (55, 168) b      | 107 (72, 312) a       | <0.0001 |
| eGFR *                              | 86.3±14.3 a         | 85.3±21.3 a         | 72.7±21.8 a         | 51.8±27.3 b           | <0.0001 |
| Urinary creatinine, mmol/L **       | 11.4 (3.7, 24) a    | 8.5 (1.5, 30) a,b   | 6.6 (2.6, 18) b     | 5.7 (2.3, 14) b       | <0.0001 |
| Urinary albumin, mg/L **            | 9.4 (2.2, 82) c     | 5.5 (2.1, 21) c     | 57 (16, 564) b      | 515 (171, 1738) a     | <0.0001 |
| Albumin creatinine, mg/mmol **      | 0.56 (0.29, 7.22) c | 0.70 (0.17, 3.33) c | 8.38 (3.40, 31.6) b | 115.4 (41.8, 262.1) a | <0.0001 |

# column %, p-value reflects result from chi-square test of Albumin creatinine group proportion equality

\* Mean±SD, p-value reflects result from one-way ANOVA test for Albumin creatinine group mean equality

a,b,c Pair of means with different letters are significantly different, p<0.05, Tukey HSD

\*\* Log value used in analysis, median (min, max) represented

### Statistical analysis of supplementary table 1.

Data were assessed for normality and appropriate transformations were used when necessary. Median (min, max) is reported for continuous non-normal data, mean±SD is reported otherwise. Chi-square tests were used to assess the relationship between control and albuminuria groups with categorical variables. One-way ANOVA was used to assess the relationship of control and albuminuria groups with continuous variables. Tukey's multiple comparison tests were used to determine group differences for significant ANOVAs. To investigate the association between albumin creatinine ratio (albuminuria), eGFR, or hypertension status and log netrin-1 we performed a linear regression using log-netrin-1 as the dependent variable and the albuminuria eGFR or hypertension as dependent variables. Various

Urinary semaphorin 3A correlates with diabetic proteinuria and mediates diabetic nephropathy and associated inflammation in mice. Riyaz Mohamed, Punithavathi Ranganathan, Calpurnia Jayakumar, Ferdau L. Nauta, Ron T. Gansevoort, Neal L. Weintraub, Michael Brands, Ganesan Ramesh. "J Mol Med 2014".

models were built to adjust for possible confounding. SAS® 9.3 (SAS Institute, Inc., Cary, NC) was used for all analyses.

Supplementary Figure S1.

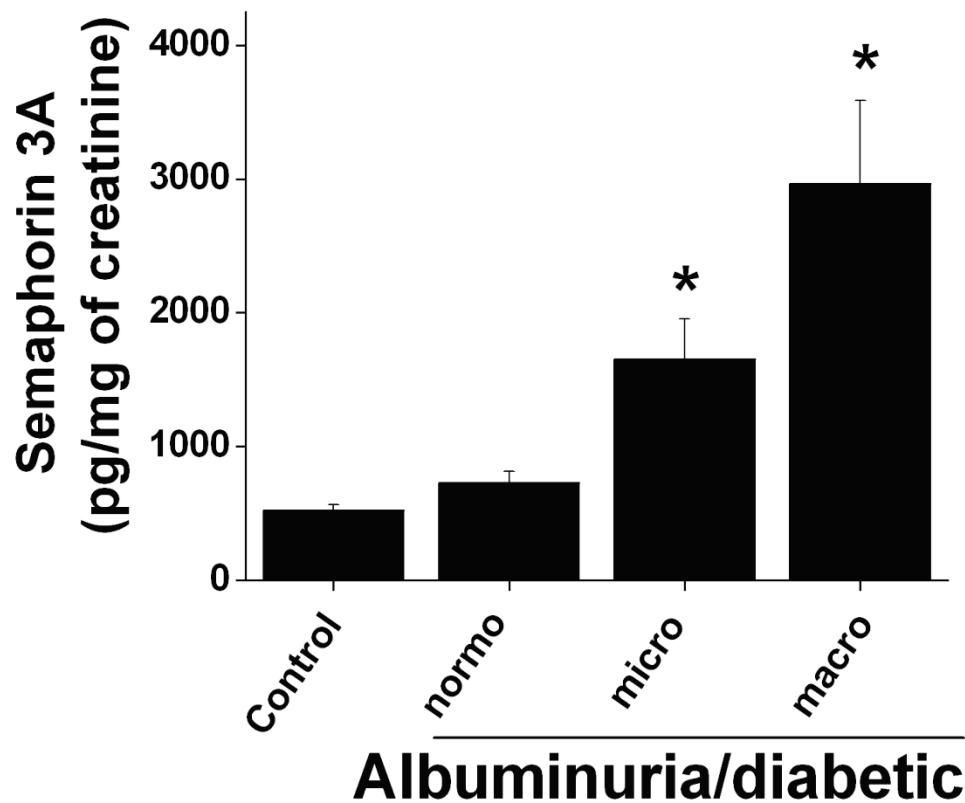

Supplementary Figure 1. Sema3A excretion in non-diabetic controls and patients with different stages of diabetic nephropathy. Sema3A was quantified by ELISA as described in Methods. A significant increase in sema3A excretion was seen in patients with both microalbuminuria and macroalbuminuria. \*,  $p < 0.001$  vs. non-diabetic control.

Urinary semaphorin 3A correlates with diabetic proteinuria and mediates diabetic nephropathy and associated inflammation in mice. Riyaz Mohamed, Punithavathi Ranganathan, Calpurnia Jayakumar, Ferdau L. Nauta, Ron T. Gansevoort, Neal L. Weintraub, Michael Brands, Ganesan Ramesh. "J Mol Med 2014".

Supplementary Figure S2.

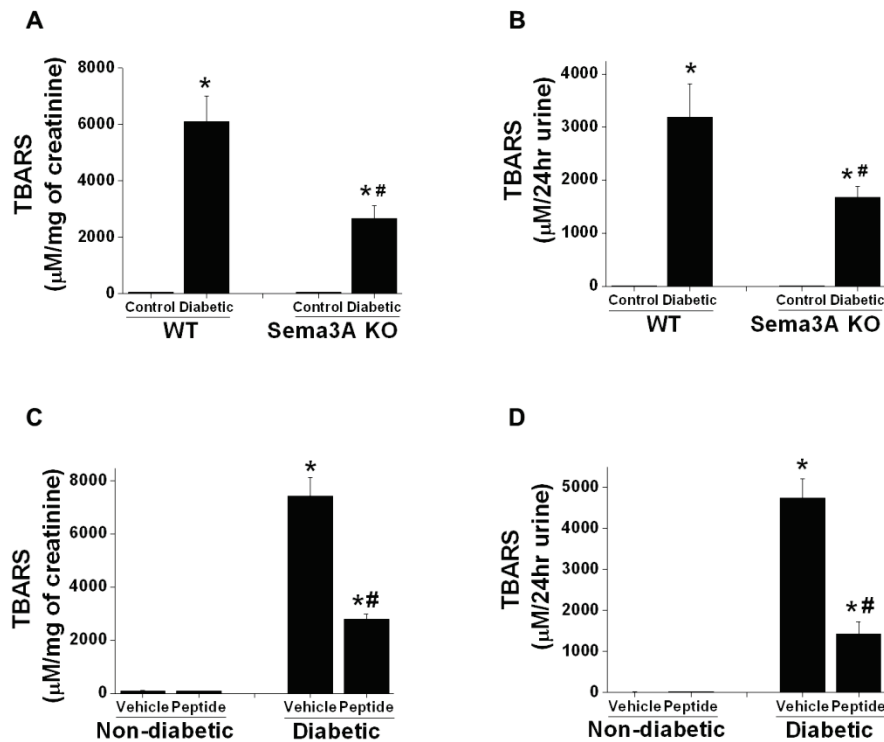

Supplementary Figure 2. Quantification of oxidative stress as measured by the excretion of thiobarbituric acid reactive substances (TBARS) in urine. TBARS excretion was normalized to 24hr urine (B&D) and to micromoles per mg of creatinine (A&C). WT diabetic mice showed increased excretion of TBARS in urine as compared to control (non-diabetic) mice, which was significantly suppressed by sema3A gene ablation (A & B). \*,  $P < 0.001$  vs. control. #,  $p < 0.05$  vs. WT diabetic.  $n = 4-6$ . Likewise, the increased excretion of TBARS in the urine of diabetic mice was significantly suppressed by treatment with the sema3A inhibitory peptide (C&D). \*,  $P < 0.001$  vs. control. #,  $p < 0.001$  vs. WT diabetic.  $n = 4-6$ .
